# Supplementary material
Source: publisher figshare collection journal article supplement (https://sage.figshare.com/ndownloader/files/18667091)
Supplement: Supplementary file 1 [file 18667091]

## Online appendix

Explaining interest group access to the European Commission's expert groups  
(Carl Vikberg)

*Table A 1 Summary statistics*

|                                      | N                | Mean  | St. Dev.          | Min.  | Max.               |
|--------------------------------------|------------------|-------|-------------------|-------|--------------------|
| Share of diffuse interests           | 223              | 0.205 | 0.269             | 0     | 1                  |
| Policy type                          | Regulatory = 200 |       | Distributive = 17 |       | Administrative = 6 |
| Salience (ln)                        | 223              | 13.71 | 2.989             | 0     | 19.01              |
| Technical                            | 223              | 0.13  | 0.337             | 0     | 1                  |
| DG age                               | 223              | 51.17 | 12.165            | 7     | 59                 |
| Relative supply of diffuse interests | 223              | 0.305 | 0.105             | 0.143 | 0.528              |

Table A 2 Coding of 20 organizations that hold the highest number of expert group seats

| <b>Group name</b>                                                                               | <b>Number of expert group seats</b> | <b>Group type</b> |
|-------------------------------------------------------------------------------------------------|-------------------------------------|-------------------|
| BUSINESSEUROPE                                                                                  | 45                                  | Specific          |
| Bureau Européen des Unions de Consommateurs (BEUC)                                              | 42                                  | Diffuse           |
| Union européenne de l'Artisanat et des petites et moyennes entreprises, aisbl (UEAPME)          | 40                                  | Specific          |
| European farmers (COPA)                                                                         | 37                                  | Specific          |
| EuroCommerce                                                                                    | 35                                  | Specific          |
| European agri-cooperatives (COGECA)                                                             | 33                                  | Specific          |
| European Environmental Bureau (EEB)                                                             | 33                                  | Diffuse           |
| European Chemical Industry Council (Cefic)                                                      | 29                                  | Specific          |
| FoodDrinkEurope (FoodDrinkEurope)                                                               | 26                                  | Specific          |
| EUROPEAN TRADE UNION CONFEDERATION (ETUC)                                                       | 24                                  | Specific          |
| European Committee for Standardization (CEN)                                                    | 20                                  | Other             |
| European Coordination Via Campesina (ECVC)                                                      | 20                                  | Specific          |
| European Liaison Committee for Agriculture and agri-food trade (celcaa)                         | 20                                  | Specific          |
| European Council of Young farmers (CEJA)                                                        | 19                                  | Specific          |
| WWF European Policy Programme (WWF EPO)                                                         | 19                                  | Diffuse           |
| International Federation of Organic Agriculture Movements EU Regional Group (IFOAM EU Group)    | 18                                  | Diffuse           |
| Association des Constructeurs Européens d'Automobiles (ACEA)                                    | 16                                  | Specific          |
| European Association for the Co-ordination of Consumer Representation in Standardisation (ANEC) | 16                                  | Diffuse           |
| European Federation of Food, Agriculture and Tourism Trade Unions (EFFAT)                       | 16                                  | Specific          |
| Stichting BirdLife Europe (BirdLife Europe)                                                     | 15                                  | Diffuse           |

Table A 3 Coding of policy areas for measuring salience

| Code in EES | Policy area in EES                                                                             | CAP code |
|-------------|------------------------------------------------------------------------------------------------|----------|
| 1           | European Integration                                                                           | 20       |
| 2           | Environment                                                                                    | 7        |
| 3           | Globalization                                                                                  | 19       |
| 4           | Economic Conditions                                                                            | 1        |
| 5           | Immigration                                                                                    | 9        |
| 6           | Interest Rates                                                                                 | 1        |
| 7           | Health Care                                                                                    | 3        |
| 8           | Climate Change                                                                                 | 7        |
| 9           | Foreign policy in general, relations between states or (international) political organisations | 19       |
| 10          | Foreign policy towards Eastern European countries that are now members of the EU               | 19       |
| 11          | Foreign policy towards Eastern European countries that are not members of the EU               | 19       |
| 12          | Foreign Policy towards Russia                                                                  | 19       |
| 13          | Foreign Policy towards United States of America                                                | 19       |
| 14          | Defence and national security of national government                                           | 16       |
| 15          | Imperialism.                                                                                   | 19       |
| 16          | Military in general (code this if you cannot use specific codes)                               | 16       |
| 17          | Military expenditure                                                                           | 16       |
| 18          | Armed forces (modernization, structure, military strength)                                     | 16       |
| 19          | NATO, Military treaties obligations, Military cooperation                                      | 16       |
| 20          | Peace (code this if you cannot use specific codes)                                             | 16       |
| 21          | Peace negotiations                                                                             | 16       |
| 22          | Peace keeping missions/troops                                                                  | 16       |
| 23          | Freedom and Human Rights (code this if you cannot use specific codes)                          | 2        |
| 24          | Civil rights, Civil liberties, Rights in general                                               | 2        |
| 25          | Equality before Law                                                                            | 2        |
| 26          | Democracy (code this if you cannot use specific codes)                                         | 2        |
| 27          | subcategory                                                                                    | 2        |
| 28          | Division of power among branches of government                                                 | 2        |
| 29          | Separation of church and state                                                                 | 2        |
| 30          | Rule of Law                                                                                    | 2        |
| 31          | Democratic role of political parties                                                           | 2        |
| 32          | Democratic role of the media                                                                   | 2        |
| 33          | Constitutionalism (code this if you cannot use specific codes)                                 | 2        |
| 34          | Discussion about national constitution                                                         | 2        |
| 35          | Decentralization (code this if you cannot use specific codes)                                  | 2        |
| 36          | Federalism, Devolution, Regional Autonomy                                                      | 2        |
| 37          | Executive and Administrative Efficiency; Efficient government and administration.              | 2        |

|    |                                                                                                                          |    |
|----|--------------------------------------------------------------------------------------------------------------------------|----|
| 38 | Political Corruption (code this if you cannot use specific codes)                                                        | 2  |
| 39 | EU political corruption, fraud, scandals EU-level politicians or institutions, including regulations and anti-corruption | 20 |
| 40 | National Political corruption (political parties, politicians, abuse of national funds, etc., including regulations      | 2  |
| 41 | Political Authority: Strong Government, Government Stability, Politicians, Political class                               | 2  |
| 42 | Financing the EC/EU: National contributions to finance the EC/EU (from member states)                                    | 20 |
| 43 | Competences of the European Commission (Powers of the European Commission)                                               | 20 |
| 44 | Competences of the European Council/Council of Ministers (Powers of the European Council/Council of Ministers)           | 20 |
| 45 | Voting procedures in the (European) Council                                                                              | 20 |
| 46 | Competences of the European Court of Justice (references to the powers of the European Court of Justice)                 | 20 |
| 47 | Competences of Other EC/EU Institutions (References to the Powers of other EC/EU Institutions)                           | 20 |
| 48 | European Central Bank                                                                                                    | 20 |
| 49 | Membership in the EU of East European countries currently not in the EU                                                  | 19 |
| 50 | Membership in the EU of Balkan countries currently not in the EU                                                         | 19 |
| 51 | Economic structure/policies/goals/conditions (code this if you cannot use specific codes)                                | 1  |
| 52 | Free enterprise capitalism                                                                                               | 1  |
| 53 | Private property rights                                                                                                  | 2  |
| 54 | Government intervention/control over the economy (prices , wages rents)                                                  | 1  |
| 55 | Social Ownership                                                                                                         | 1  |
| 56 | Publicly-Owned Industry                                                                                                  | 1  |
| 57 | Economic Planning (of long-term economic planning, create of such a plan by authorities.)                                | 1  |
| 58 | EC/EU Structural Fund (EU funds for underdeveloped regions/areas)                                                        | 14 |
| 59 | Government Ownership, nationalisation in general (land. Banks, etc.)                                                     | 1  |
| 60 | Privatisation (of government owned business or industry)                                                                 | 1  |
| 61 | Corporatism (involvement of collaborations of employees and trade unions in the economic planning)                       | 1  |
| 62 | National policy on monopolies, Trusts, consumer and small businesses protection                                          | 15 |
| 63 | Incentives (references to tax and wage policies, financial incentives to start enterprises or stimulate investment)      | 1  |
| 64 | Productivity (references to economic growth, the need to increase/facilitate production)                                 | 1  |
| 65 | Technology and Infrastructure (modernization, development of industry, methods of transport, communication, research)    | 1  |
| 66 | National energy policy                                                                                                   | 8  |
| 67 | National transportation policy                                                                                           | 10 |
| 68 | National media and ICT policy                                                                                            | 23 |
| 69 | Protectionism (as opposed to international cooperation, methods to protect national markets, economic growth)            | 18 |

|     |                                                                                                                            |    |
|-----|----------------------------------------------------------------------------------------------------------------------------|----|
| 70  | Anti-Growth Economy (references to alternative economic planning e.g. Green Politics)                                      | 7  |
| 71  | Creating Jobs (specifically)                                                                                               | 1  |
| 72  | Labour Migration/Emigration                                                                                                | 9  |
| 73  | Single Market/Common market                                                                                                | 15 |
| 74  | Inflation                                                                                                                  | 1  |
| 75  | Unemployment                                                                                                               | 1  |
| 76  | National employment policies                                                                                               | 1  |
| 77  | Stock market and its developments (shares, bonds, AEX, DAX, Dow Jones etc.)                                                | 15 |
| 78  | Business (companies, banks, industry, mergers, manufacturing,)                                                             | 15 |
| 79  | Bankruptcy of business, companies, banks (specifically)                                                                    | 15 |
| 80  | Debt (public debt of a state, a community etc.)                                                                            | 1  |
| 81  | Taxes                                                                                                                      | 1  |
| 82  | Trade (international trade), trade deficits                                                                                | 18 |
| 83  | Wages and Earnings                                                                                                         | 5  |
| 84  | Effect of Euro on the Economy                                                                                              | 1  |
| 85  | Effects of financial crisis on domestic/ EU/ global economy.                                                               | 1  |
| 86  | Environmental Protection                                                                                                   | 7  |
| 87  | National environmental policy                                                                                              | 7  |
| 88  | Culture (code this if you cannot use specific codes)                                                                       | 23 |
| 89  | National cultural policy (subsidies for theatre's, movies, music etc.; the export of own culture, language etc.            | 23 |
| 90  | Social Justice                                                                                                             | 13 |
| 91  | Welfare State (code this if you cannot use specific codes)                                                                 | 13 |
| 92  | Pensions                                                                                                                   | 5  |
| 93  | Nursing Services                                                                                                           | 3  |
| 94  | National health care policy                                                                                                | 3  |
| 95  | Social Housing                                                                                                             | 13 |
| 96  | Child Care                                                                                                                 | 13 |
| 97  | Education (code this if you cannot use specific codes)                                                                     | 6  |
| 98  | National Education Policy                                                                                                  | 6  |
| 99  | Multiculturalism (cultural diversity, cultural plurality)                                                                  | 9  |
| 100 | Law and Order (code this if you cannot use specific codes)                                                                 | 12 |
| 101 | Fight against terrorism                                                                                                    | 12 |
| 102 | National Crime prevention policy(ies)                                                                                      | 12 |
| 103 | Courts, trials, court decisions                                                                                            | 12 |
| 104 | National Way of Life (reference to patriotism/nationalism, support/opposition for established national ideas and/or values | 23 |
| 105 | National Immigration policy                                                                                                | 9  |
| 106 | Cyprus Issue                                                                                                               | 19 |
| 107 | Labour Groups (references to trade unions, unemployed, employees)                                                          | 5  |
| 108 | Agriculture and Farmers (code this if you cannot use specific codes)                                                       | 4  |
| 109 | National Agricultural policy                                                                                               | 4  |
| 110 | Underprivileged Minority Groups (code this if you cannot use specific codes)                                               | 2  |
| 111 | Handicapped (policies aimed at, treatment)                                                                                 | 2  |
| 112 | Homosexuals                                                                                                                | 2  |

|     |                                                                                                                                |     |
|-----|--------------------------------------------------------------------------------------------------------------------------------|-----|
| 113 | Gay marriage                                                                                                                   | 2   |
| 114 | Ethnic Minorities                                                                                                              | 2   |
| 115 | Non-economic Demographic Groups (code this if you cannot use specific codes)                                                   | 2   |
| 116 | Women (policies aimed at, treatment)                                                                                           | 2   |
| 117 | Abortion                                                                                                                       | 3   |
| 118 | Old People (policies aimed at, treatment)                                                                                      | 2   |
| 119 | Young People (policies aimed at, treatment)                                                                                    | 2   |
| 120 | Linguistic Groups (policies aimed at, treatment)                                                                               | 2   |
| 121 | National language policies                                                                                                     | 23  |
| 122 | European Elections: European Elections in general                                                                              | 20  |
| 123 | European Elections: profiles of candidates, politicians, parties; their images and strategic positions                         | 20  |
| 124 | European Elections: Electioneering, campaigning (strategy, style, finance, fundraising, events, media appearances, endorsement | 20  |
| 125 | Media coverage of the campaign                                                                                                 | 20  |
| 126 | European elections: Voters, public opinion, polls, (anticipated) electoral success                                             | 20  |
| 127 | European Election: Voter turnout (e.g. expectations) (only if EU elections)                                                    | 20  |
| 128 | European Elections: list of party positions on issues (a “manifesto story“)                                                    | 20  |
| 129 | European Elections: Voting procedures (e.g. electronic voting machines, foreign votes                                          | 20  |
| 130 | European Elections: Election laws, rules, regulations                                                                          | 20  |
| 131 | European Elections: (Formal, public) debates (as an event) between parties, politicians                                        | 20  |
| 132 | Political consequences of EP election outcome (e.g. for national-level politicians, parties)                                   | 20  |
| 133 | EU-level politicians’ personality (e.g., candidate MEP’s personal character, background, leadership qualities)                 | 20  |
| 134 | Vote advice for European Elections                                                                                             | 20  |
| 135 | Other EU election-related topics                                                                                               | 20  |
| 136 | National elections in EU Countries                                                                                             | 2   |
| 137 | National elections in non-EU Countries                                                                                         | 2   |
| 138 | Other topic related to elections                                                                                               | 2   |
| 139 | Accidents                                                                                                                      | 7   |
| 140 | Crime story                                                                                                                    | 12  |
| 141 | Culture (arts, films/movies, theatre, music, media)                                                                            | 23  |
| 142 | Human interest (soft news: about prominent persons, celebrities, anniversaries, weddings, animals, strange/funny events,       | 23  |
| 143 | (Natural) disasters (earthquakes, floods)                                                                                      | 7   |
| 144 | Religion                                                                                                                       | 2   |
| 145 | Sports                                                                                                                         | 23  |
| 146 | Weather Report/ Forecast                                                                                                       | 17  |
| 147 | Population (i.e. overcrowding, increase in population, decrease in population, birth rates, demographic)                       | 7   |
| 148 | Any other topic                                                                                                                | N/A |

---

Table A 4 Coding of policy areas for measuring relative supply

| <b>Expert group register</b>   | <b>Transparency register</b>            |
|--------------------------------|-----------------------------------------|
| Administration                 | General and Institutional Affairs       |
| Agriculture                    | Agriculture and Rural Development       |
| Audiovisual                    | Audiovisual and Media                   |
| Budget                         | Budget                                  |
| Civil protection               | Humanitarian Aid                        |
| Climate                        | Climate Action                          |
| Communication                  | Communication                           |
| Competition                    | Competition                             |
| Consumer affairs               | Consumer Affairs                        |
| Culture                        | Culture                                 |
| Customs                        | Customs                                 |
| Development                    | Development                             |
| Economic and Monetary Affairs  | Economic and Financial Affairs          |
| Education                      | Education                               |
| Employment and Social Affairs  | Employment and Social Affairs           |
| Energy                         | Energy                                  |
| Enlargement                    | Enlargement                             |
| Enterprise                     | Enterprise                              |
| Environment                    | Environment                             |
| External Relations             | External Relations                      |
| External Trade                 | Trade                                   |
| Fisheries and Maritime Affairs | Fisheries and Aquaculture               |
| Food Safety                    | Food Safety                             |
| Foreign and Security Policy    | Foreign and Security Policy and Defence |
| Fraud Prevention               | General and Institutional Affairs       |
| Humanitarian aid               | Humanitarian Aid                        |
| Human rights                   | Justice and Fundamental Rights          |
| Information Society            | Information Society                     |
| Institutional affairs          | General and Institutional Affairs       |
| Internal Market                | Internal Market                         |
| Justice and Home Affairs       | Home Affairs                            |
| Languages and multilingualism  | Culture                                 |
| Public Health                  | Public Health                           |

|                         |                                      |
|-------------------------|--------------------------------------|
| Regional Policy         | Regional Policy                      |
| Research and Innovation | Research and Technology              |
| Sports                  | Sport                                |
| Statistics              | General and Institutional<br>Affairs |
| Taxation                | Taxation                             |
| Training                | Education                            |
| Transport               | Transport                            |
| Youth                   | Youth                                |

---



Table A 5 OLS regression explaining the share of diffuse interests in expert groups

|                                           |                      |
|-------------------------------------------|----------------------|
| <i>Policy type (baseline: regulatory)</i> |                      |
| Distributive                              | 0.255***<br>(0.055)  |
| Administrative                            | -0.119<br>(0.075)    |
| Salience (ln)                             | 0.009**<br>(0.004)   |
| Technical                                 | 0.050<br>(0.064)     |
| DG Age                                    | -0.007***<br>(0.002) |
| Relative supply                           | 0.361*<br>(0.188)    |
| Constant                                  | 0.303**<br>(0.142)   |
| Observations                              | 223                  |

Note: \* p<0.1; \*\* p<0.05; \*\*\* p<0.01. Robust standard errors in parentheses.

Table A 6 Fractional logit regression with alternative dependent variable

|                                           | Trade unions as diffuse |                      | Cross-sectoral as diffuse |                      |
|-------------------------------------------|-------------------------|----------------------|---------------------------|----------------------|
|                                           | (1)                     | (2)                  | (3)                       | (4)                  |
| <i>Policy type (baseline: regulatory)</i> |                         |                      |                           |                      |
| Distributive                              | 1.406***<br>(0.178)     | 1.037***<br>(0.234)  | 0.982***<br>(0.212)       | 0.614**<br>(0.265)   |
| Administrative                            | 0.332<br>(0.674)        | 0.248<br>(0.642)     | 0.234<br>(0.851)          | 0.155<br>(0.851)     |
| Salience (ln)                             | 0.108**<br>(0.044)      | 0.094**<br>(0.044)   | 0.212***<br>(0.049)       | 0.199***<br>(0.047)  |
| Technical                                 | 0.357<br>(0.350)        | 0.420<br>(0.354)     | 0.252<br>(0.328)          | 0.315<br>(0.321)     |
| DG Age                                    | -0.036***<br>(0.009)    | -0.031***<br>(0.009) | -0.022***<br>(0.008)      | -0.017**<br>(0.008)  |
| Relative supply                           |                         | 3.109***<br>(1.049)  |                           | 2.998***<br>(0.990)  |
| Constant                                  | -0.920<br>(0.817)       | -1.929**<br>(0.863)  | -2.808***<br>(0.849)      | -3.799***<br>(0.857) |
| Observations                              | 223                     | 223                  | 223                       | 223                  |

Note: \* p<0.1; \*\* p<0.05; \*\*\* p<0.01. Robust standard errors in parentheses.

Table A 7 Fractional logit regression explaining the share of diffuse interests in expert groups (excluding outliers)

| <i>Policy type (baseline: regulatory)</i> |                      |
|-------------------------------------------|----------------------|
| Distributive                              | 1.481***<br>(0.227)  |
| Administrative                            | -0.721<br>(0.934)    |
| Salience (ln)                             | 0.076*<br>(0.039)    |
| Technical                                 | -0.035<br>(0.330)    |
| DG Age                                    | -0.028***<br>(0.007) |
| Relative supply                           | 2.048*<br>(1.073)    |
| Constant                                  | -2.182***<br>(0.791) |
| Observations                              | 208                  |

Note: \* p<0.1; \*\* p<0.05; \*\*\* p<0.01. Robust standard errors in parentheses.

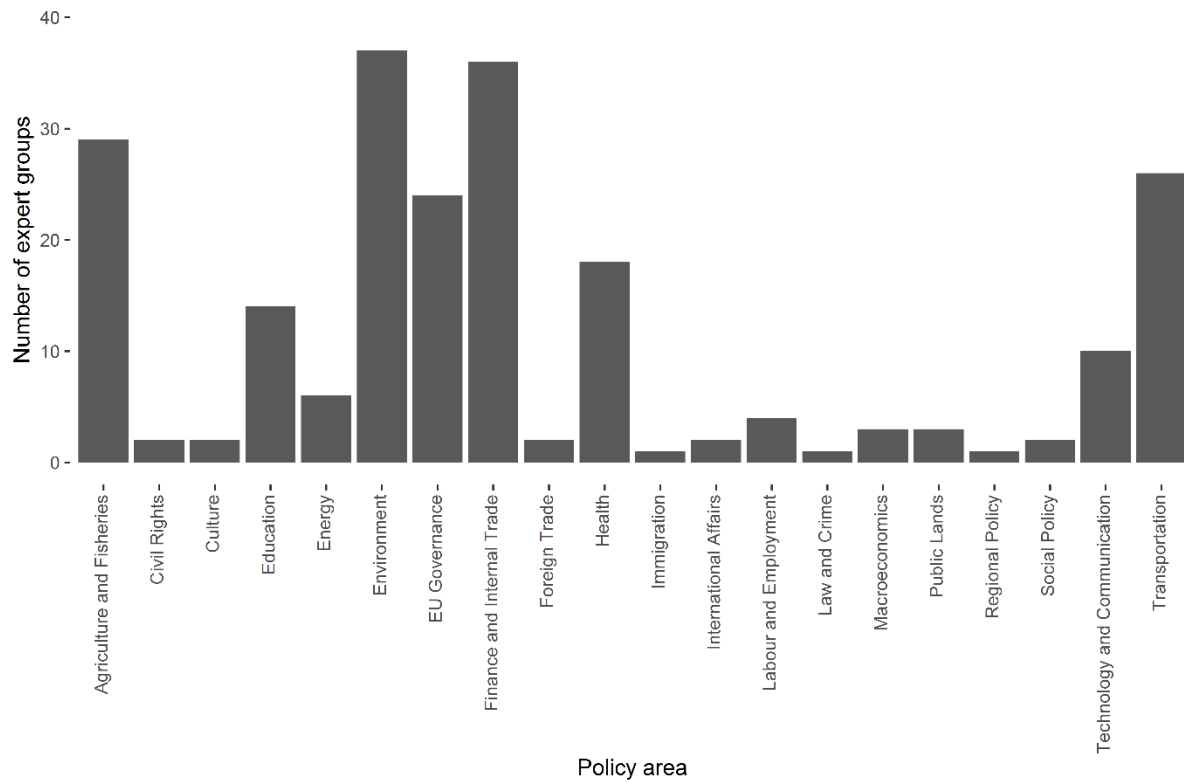

*Figure A 1 Number of expert groups with interest groups participants across policy areas (abbreviated policy area categories from Comparative Agendas Project)*
